# Supplementary material
Source: publisher site journal article supplement (https://www.dovepress.com/article/371906)
Supplement: Supplementary file 1 [file get_supplementary_file.php]

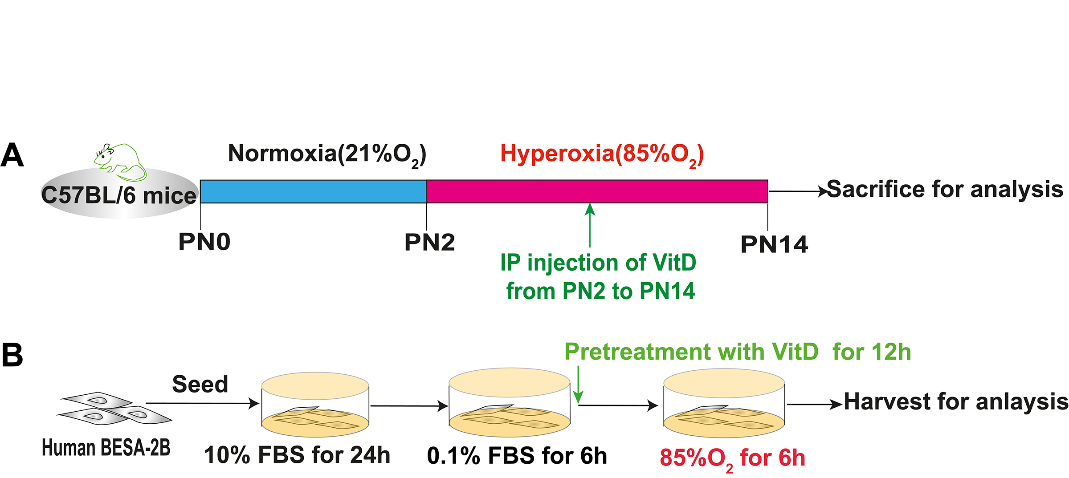


**Supplementary Figure 1** Experimental protocol for animal model and cell culture.

(A) Newborn C57BL/6 mice were exposed to 85% O2 from PN2 to PN14 to induce bronchopulmonary dysplasia (BPD). Vitamin D (VitD) treatment was performed (5 µg/Kg) 30 min prior to the first induction of BPD and repeated every day after the first intraperitoneal injection. Lungs were harvested at PN14. (B) The BEAS-2B cells were seeded in six-well plates and cultured for 24 h. Then, they were incubated in Dulbecco’s modified Eagle’s medium with the addition of 10 nM calcitriol for 12 h. Subsequently, the cells were maintained in hyperoxia (85% O2) for another 6 h, when they were harvested for analyses.


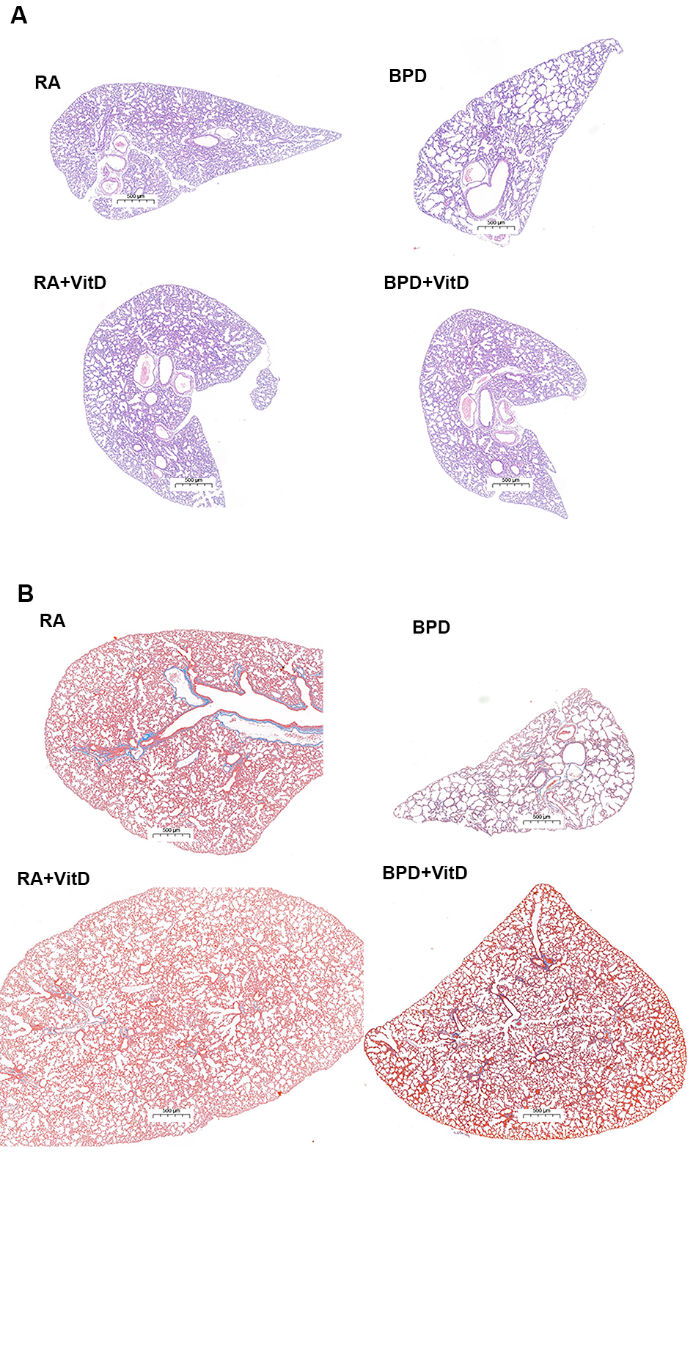


**Supplementary Figure 2** The low magnification (magnification at × 2) images of Hematoxylin and eosin and Masson’s trichrome staining.

(A) The low magnification (magnification at × 2) images of Hematoxylin and eosin. (B) The low magnification (magnification at × 2) images of Masson’s trichrome staining.
